# Supplementary material
Source: HighWire-hosted journal article supplement (http://www.cmajopen.ca/highwire/filestream/81008/field_highwire_adjunct_files/0/open-2016-0133-1-at.pdf)
Supplement: open-2016-0133-1-at.pdf [file open-2016-0133-1-at.pdf]

## Appendix 1 (as supplied by the authors): Focus Group Guide

Participants were welcomed, reminded that their cooperation is needed to treat anything discussed during the focus group as confidential, and told that the general aim of the focus groups was to explore perceptions about retirement and the extent to which they have planned for retirement. Questions included:

- (1) Thinking in general, what kind of mental association do you have with the concept of retirement?
- (2) Again thinking about the concept of retirement in general, why is it that some academic physicians never retire?
- (3) What are some strategies for successful late life career transitions that are relevant to academic physicians?
- (4) What sorts of activities or ideas do you have that the Department of Medicine or the university could create to engage retired academic physicians?
- (5) Are there any other comments about late life career transitions as they relate to faculty in the department of medicine that you would like to share?
